# Supplementary material
Source: PubMed Central journal article supplement (PMC4560062)
Supplement: supp_WNL.0000000000001907_Figure_e-3.pdf [file supp_WNL.0000000000001907_Figure_e-3.pdf]

# Figure e-3

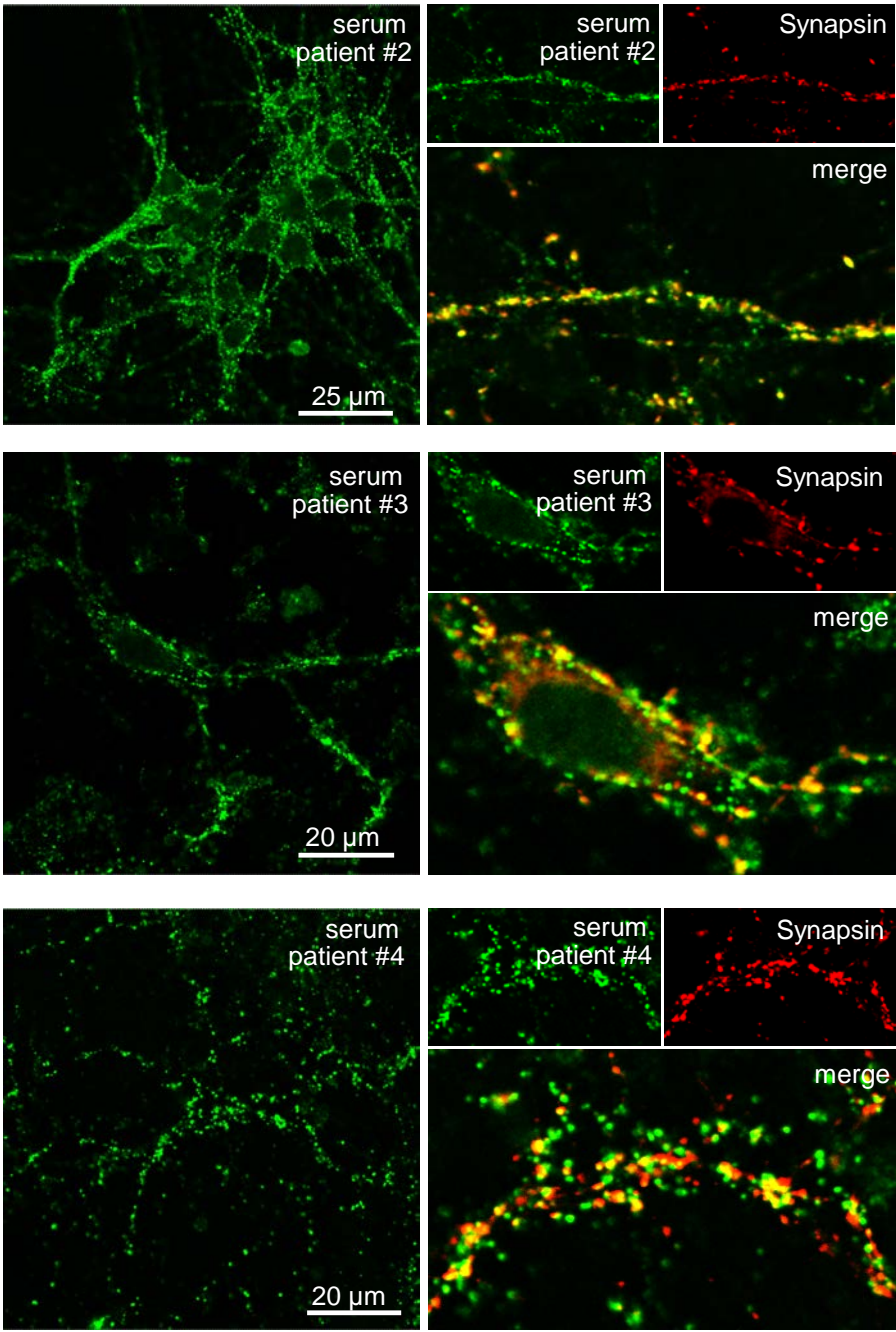

## Staining of cultured hippocampal neurons by anti-DPPX sera

Living cultured primary hippocampal neurons were incubated for 2 hours with sera (all at 1:100) from 3 different patients with anti-DPPX encephalitis. Staining with a FITC-labeled anti-human IgG secondary antibody demonstrated a punctuate staining pattern at the neuronal surface. IgG-positive signals showed a partial overlap with synapsin-positive spots, indicating a perisynaptic localization.
